# Supplementary material for: Induction and Resuscitation of Viable but Nonculturable Corynebacterium diphtheriae
Source: MDPI journal article supplement (doi:10.3390/microorganisms9050927), 2021-04-26
Supplement: s1 [file s1]

Table S14. Primers used for RT-qPCR.

| Gene                  | Primer Sequence (5'-3') | Amplicon Size (bp) |
|-----------------------|-------------------------|--------------------|
| <i>tox</i> (DIP0222)  | TCCGGGGCATAAAACACAAC    | 140                |
|                       | GAAGCGGGGTATTTTCAGCA    |                    |
| <i>dtxR</i> (DIP1414) | GCACTTTAGCGACTGCAGTT    | 152                |
|                       | TACTTTCACGAGCCTGCGTT    |                    |
| DIP0751               | GGGGCTGATTTTGGTTTCGACT  | 84                 |
|                       | CGACGCTTAAAATCGGTGGTCT  |                    |
| DIP1120               | CAAGCGAAAAGGAGTTGTGTG   | 56                 |
|                       | GGTAACCGTGATGTTCTGGTTG  |                    |
| 16S rRNA              | TGCAACGCGAAGAACCTTAC    | 132                |
|                       | GGGACTTAACCCAACATCTCAC  |                    |

Table S2. Genes with increased or decreased (>2-fold) expression level ( $P < 0.05$ ) on one or more conditions.

| Name    | VBNC vs.<br>Culturable -<br>Fold change | VBNC vs.<br>Culturable -<br>P-value | VBNC+catalase<br>vs. VBNC -<br>Fold change | VBNC+catalase<br>vs. VBNC - P-<br>value | Resuscitation vs.<br>VBNC+catalase -<br>Fold change | Resuscitation vs.<br>VBNC+catalase -<br>P-value | Resuscitation<br>vs. Culturable -<br>Fold change | Resuscitation<br>vs. Culturable -<br>P-value |
|---------|-----------------------------------------|-------------------------------------|--------------------------------------------|-----------------------------------------|-----------------------------------------------------|-------------------------------------------------|--------------------------------------------------|----------------------------------------------|
| accBC   | -4.674821838                            | 2.71952E-05                         | 1.130210524                                | 0.739146085                             | 2.939585574                                         | 0.00335153                                      | -1.407082656                                     | 0.352774227                                  |
| aceE    | -3.368164615                            | 0.000176035                         | 1.063697158                                | 0.848733032                             | 2.001581807                                         | 0.032078942                                     | -1.581983556                                     | 0.156529743                                  |
| adhA    | -2.0462651                              | 0.001297125                         | -1.104780937                               | 0.654400789                             | 1.925098675                                         | 0.00326592                                      | -1.174316259                                     | 0.470515253                                  |
| ag84    | -2.625274199                            | 3.65419E-06                         | -1.03871707                                | 0.855455168                             | 2.079256351                                         | 0.000448306                                     | -1.311486736                                     | 0.193383679                                  |
| asd     | -2.961794494                            | 1.35977E-05                         | -1.005652927                               | 0.981986885                             | 2.285587725                                         | 0.000929428                                     | -1.303182228                                     | 0.288681679                                  |
| aspA    | -3.21782538                             | 9.96636E-07                         | -1.066024867                               | 0.789025902                             | 2.491803833                                         | 0.000132848                                     | -1.376625972                                     | 0.180869801                                  |
| atpA    | -1.771882954                            | 0.01935474                          | -1.043127825                               | 0.862926168                             | 2.070174733                                         | 0.002929009                                     | 1.120042348                                      | 0.643048722                                  |
| atpB    | -3.149018751                            | 5.95653E-05                         | -1.010039867                               | 0.97211792                              | 2.54603405                                          | 0.00107506                                      | -1.249250567                                     | 0.436017982                                  |
| atpC    | -2.126415811                            | 5.44815E-05                         | 1.095821564                                | 0.624148626                             | 1.949307188                                         | 0.000351652                                     | 1.004550869                                      | 0.980624259                                  |
| atpD    | -2.045100679                            | 0.001045621                         | -1.038928474                               | 0.861089092                             | 2.317356332                                         | 0.000117641                                     | 1.090667763                                      | 0.69088322                                   |
| atpE    | -1.947555331                            | 0.000908898                         | 1.045162826                                | 0.82555463                              | 2.423838086                                         | 9.65299E-06                                     | 1.300761742                                      | 0.18994851                                   |
| atpF    | -2.125234982                            | 6.54389E-05                         | 1.002439736                                | 0.989700264                             | 2.157802916                                         | 4.61248E-05                                     | 1.017801515                                      | 0.925552075                                  |
| atpG    | -2.003022851                            | 0.00016165                          | -1.031612181                               | 0.865747639                             | 2.328582755                                         | 4.39085E-06                                     | 1.126910204                                      | 0.516393818                                  |
| catI    | -3.740899454                            | 5.92784E-05                         | -1.000014309                               | 0.999965256                             | 2.275611642                                         | 0.012335132                                     | -1.643932959                                     | 0.130271809                                  |
| cspI    | -2.081195639                            | 0.001181835                         | -1.025442137                               | 0.911474685                             | 1.872257328                                         | 0.005522307                                     | -1.139878408                                     | 0.562426349                                  |
| cspA    | -7.850605509                            | 1.44329E-14                         | 1.042918259                                | 0.875626901                             | 5.05259865                                          | 1.50901E-09                                     | -1.48983469                                      | 0.136029048                                  |
| cspB    | -2.219371207                            | 0.00129552                          | -1.060314761                               | 0.813194977                             | 2.103965972                                         | 0.00269307                                      | -1.118474387                                     | 0.651461882                                  |
| ctaD    | -3.317024643                            | 0.000185843                         | -1.050359351                               | 0.878295314                             | 3.140675132                                         | 0.000360957                                     | -1.10933723                                      | 0.746353023                                  |
| ctaE    | -2.86998813                             | 7.64494E-05                         | -1.027599631                               | 0.918668388                             | 2.156949519                                         | 0.00393957                                      | -1.367300774                                     | 0.240557995                                  |
| dapA    | -2.661019187                            | 2.93672E-05                         | -1.051006894                               | 0.831850832                             | 1.757517279                                         | 0.016131116                                     | -1.591306978                                     | 0.047410159                                  |
| deaD    | -4.477172992                            | 3.36886E-05                         | 1.247096526                                | 0.541298182                             | 1.998529211                                         | 0.055431635                                     | -1.796359708                                     | 0.105111078                                  |
| def     | -4.341359671                            | 1.66956E-05                         | 1.12307726                                 | 0.733698939                             | 1.177868336                                         | 0.631549913                                     | -3.281854984                                     | 0.000496481                                  |
| DIP0006 | -2.445837231                            | 1.84051E-06                         | 1.116520348                                | 0.556577979                             | 1.819366668                                         | 0.001414232                                     | -1.204039336                                     | 0.32213313                                   |
| DIP0017 | 2.026370782                             | 0.023037083                         | -1.004462369                               | 0.988364304                             | -1.074579358                                        | 0.814746064                                     | 1.877356497                                      | 0.043771244                                  |
| DIP0061 | -3.216772383                            | 0.041575822                         | 1.555952135                                | 0.440685379                             | -1.060095463                                        | 0.918930229                                     | -2.191639276                                     | 0.171164779                                  |
| DIP0063 | -5.791075508                            | 0.000143934                         | 1.480902462                                | 0.39543296                              | 1.118046703                                         | 0.809176948                                     | -3.497621638                                     | 0.006731064                                  |
| DIP0064 | -4.859789599                            | 6.84888E-05                         | 1.304495329                                | 0.503274673                             | 1.021848242                                         | 0.956605489                                     | -3.645763871                                     | 0.001125691                                  |
| DIP0067 | -2.655210853                            | 0.002947388                         | 1.529105142                                | 0.195992592                             | -1.089155369                                        | 0.794855754                                     | -1.891261155                                     | 0.052374644                                  |
| DIP0074 | -1.713844357                            | 0.147694997                         | -1.765554994                               | 0.126838964                             | 2.302900896                                         | 0.025179706                                     | -1.313945585                                     | 0.46345292                                   |
| DIP0089 | -2.056345119                            | 0.007167623                         | 1.090822666                                | 0.74573648                              | 1.045681784                                         | 0.867704544                                     | -1.802778243                                     | 0.027984688                                  |

|         |              |             |              |             |              |             |              |             |
|---------|--------------|-------------|--------------|-------------|--------------|-------------|--------------|-------------|
| DIP0093 | -13.82301205 | 3.6014E-11  | 1.033376247  | 0.934106595 | 6.702704432  | 1.63491E-06 | -1.995694881 | 0.081388542 |
| DIP0100 | -1.779918924 | 0.027230212 | -1.078135983 | 0.773115558 | 2.018589741  | 0.007130415 | 1.051899624  | 0.846399009 |
| DIP0113 | -4.486612018 | 0.000140198 | 1.208886975  | 0.630397602 | 1.095786967  | 0.816550343 | -3.386933628 | 0.001973931 |
| DIP0118 | -5.346474834 | 6.54604E-07 | 1.128914499  | 0.719194669 | 1.283792705  | 0.459137693 | -3.689024782 | 0.000108448 |
| DIP0124 | -4.166514985 | 0.000146052 | 1.222175189  | 0.593431429 | 1.060365862  | 0.87607842  | -3.215020509 | 0.0018882   |
| DIP0126 | -2.164752305 | 0.006354392 | 1.096023792  | 0.745937134 | 1.032893015  | 0.908982926 | -1.912198127 | 0.022036494 |
| DIP0129 | -2.013159993 | 0.008021952 | -1.066681007 | 0.806742583 | 1.486833419  | 0.133336992 | -1.444277148 | 0.164252948 |
| DIP0131 | -2.256463018 | 0.009273051 | 1.159750842  | 0.635606061 | -1.037555211 | 0.906187621 | -2.018713744 | 0.024744302 |
| DIP0149 | -4.197641659 | 1.36313E-05 | 1.298265142  | 0.428848096 | 1.056638688  | 0.86749199  | -3.059957939 | 0.000703089 |
| DIP0150 | -2.986904927 | 0.000402273 | -1.000548863 | 0.998584606 | 1.426835746  | 0.250728363 | -2.094525832 | 0.016864434 |
| DIP0151 | -2.822487021 | 0.002191187 | 2.142949148  | 0.024408079 | -1.014916118 | 0.965127833 | -1.336750139 | 0.391572578 |
| DIP0153 | -6.06464853  | 3.84478E-06 | 1.203678706  | 0.634807855 | 1.315962044  | 0.481850039 | -3.828703154 | 0.00058154  |
| DIP0161 | -1.704037938 | 0.043510063 | 1.053995484  | 0.8420036   | 2.207684739  | 0.002680784 | 1.365515223  | 0.237965502 |
| DIP0174 | -2.303309132 | 0.002130757 | 1.133404     | 0.644793    | 1.061552386  | 0.82601595  | -1.91436999  | 0.016867262 |
| DIP0176 | -2.863953985 | 0.001327396 | 1.012002701  | 0.970965935 | 1.089491668  | 0.793781848 | -2.597529274 | 0.003598109 |
| DIP0177 | -2.298855438 | 0.000218877 | 1.07068072   | 0.761687257 | 1.163250625  | 0.502149184 | -1.845773409 | 0.006529798 |
| DIP0186 | -2.255467355 | 0.001270466 | -1.055455273 | 0.830709752 | 1.599404724  | 0.063271451 | -1.488394322 | 0.115680978 |
| DIP0233 | -4.376020026 | 6.37932E-05 | 1.528681967  | 0.250341604 | 1.044015264  | 0.907130161 | -2.741923349 | 0.006297327 |
| DIP0237 | -4.367361215 | 0.001449246 | 1.578649858  | 0.323974862 | -1.005178189 | 0.99109817  | -2.780842257 | 0.027148173 |
| DIP0240 | -7.108148501 | 1.41422E-05 | 1.380225685  | 0.475700264 | 1.077995064  | 0.868000302 | -4.777378107 | 0.000537282 |
| DIP0247 | -3.129027212 | 0.003540838 | 1.33451      | 0.460667    | -1.023949668 | 0.951757012 | -2.400856051 | 0.025164407 |
| DIP0252 | -7.019277633 | 5.42068E-06 | 1.430931421  | 0.403069227 | 1.205820577  | 0.662324536 | -4.068093346 | 0.001058469 |
| DIP0263 | -4.576088789 | 4.06701E-05 | 1.074723046  | 0.845851064 | 1.216890077  | 0.596470889 | -3.499020853 | 0.0007278   |
| DIP0274 | -2.882070153 | 0.001929288 | 1.038119     | 0.912734    | 1.113103797  | 0.753641661 | -2.494144233 | 0.007428848 |
| DIP0294 | -2.206939438 | 0.015751348 | 1.045432203  | 0.892194255 | 1.024510889  | 0.94113116  | -2.060525356 | 0.02747296  |
| DIP0303 | -2.661507274 | 2.30814E-06 | 1.07482598   | 0.727685124 | 2.1735487    | 0.000179089 | -1.139252858 | 0.529161673 |
| DIP0308 | -2.604732562 | 0.0006891   | 1.16667885   | 0.584699266 | 1.027205024  | 0.924237171 | -2.173475151 | 0.005951717 |
| DIP0312 | -2.239015871 | 0.009641199 | 1.020575566  | 0.947850593 | -1.084643901 | 0.794328704 | -2.379573831 | 0.005412461 |
| DIP0314 | -1.949731936 | 0.024592223 | 1.018579275  | 0.950573535 | -1.074630631 | 0.808744043 | -2.057023654 | 0.015311918 |
| DIP0319 | -3.271924446 | 0.001163222 | 1.177651     | 0.654146    | 1.025482088  | 0.94504403  | -2.709309409 | 0.006324869 |
| DIP0331 | -3.72073863  | 0.000164934 | 1.288652876  | 0.467168166 | 1.168578903  | 0.655165898 | -2.470786241 | 0.009508569 |
| DIP0333 | -2.352527227 | 0.007978567 | 1.495132091  | 0.212264225 | 1.020146633  | 0.950677726 | -1.542383941 | 0.179030846 |
| DIP0336 | 2.026230647  | 0.002061197 | 1.039035694  | 0.864523579 | -1.374615847 | 0.160046717 | 1.531574055  | 0.06518066  |
| DIP0349 | -3.415103753 | 0.000426086 | 1.08843589   | 0.807970569 | 1.151906054  | 0.685195897 | -2.72385502  | 0.004064955 |
| DIP0350 | -4.214564143 | 0.000113473 | 1.027345371  | 0.942314956 | 1.358062623  | 0.411868004 | -3.02076126  | 0.003025335 |

|         |              |             |              |             |              |             |              |             |
|---------|--------------|-------------|--------------|-------------|--------------|-------------|--------------|-------------|
| DIP0352 | -2.319226008 | 0.001397533 | 1.401208673  | 0.199295429 | 1.309108013  | 0.305901826 | -1.26434261  | 0.373463744 |
| DIP0370 | -4.905700516 | 1.02573E-10 | 1.031217534  | 0.90067484  | 4.840977594  | 1.46805E-10 | 1.017612258  | 0.943389874 |
| DIP0371 | -5.280620486 | 5.68764E-07 | 1.009312849  | 0.977777781 | 5.513163201  | 2.88311E-07 | 1.053759965  | 0.874911078 |
| DIP0372 | -4.994325692 | 2.18826E-09 | -1.124683422 | 0.662360108 | 6.417002522  | 4.71667E-12 | 1.142418049  | 0.620079379 |
| DIP0373 | -4.945931449 | 2.77655E-08 | -1.00848727  | 0.976602796 | 5.865604261  | 7.89258E-10 | 1.175964592  | 0.572765763 |
| DIP0395 | -1.945797519 | 0.000851957 | -1.004331145 | 0.982709428 | 2.00038413   | 0.000509661 | 1.023620146  | 0.906914414 |
| DIP0396 | -2.615991214 | 3.56046E-05 | 1.047327249  | 0.842496953 | 3.004039974  | 2.20625E-06 | 1.20268482   | 0.426833511 |
| DIP0417 | -2.684522083 | 1.80235E-05 | 1.17560749   | 0.482357077 | 1.275824313  | 0.290669687 | -1.789838156 | 0.011564336 |
| DIP0460 | -2.030601752 | 0.010610199 | 1.0370048    | 0.895692705 | -1.068806066 | 0.81045859  | -2.09287312  | 0.007780883 |
| DIP0491 | -2.615450763 | 0.001843068 | 1.156758969  | 0.637125744 | 1.149663292  | 0.651516991 | -1.966676862 | 0.028505111 |
| DIP0534 | -4.669383082 | 5.88186E-09 | -1.13648811  | 0.629107845 | 4.328407767  | 3.1565E-08  | -1.226016272 | 0.441426263 |
| DIP0558 | -2.140302749 | 0.023350976 | 1.242211077  | 0.517938102 | 1.158141522  | 0.661787794 | -1.487709648 | 0.236707421 |
| DIP0565 | -3.143317322 | 0.001267423 | 1.097138714  | 0.794170593 | 1.007604557  | 0.982993017 | -2.843390859 | 0.003276549 |
| DIP0578 | -3.176485258 | 5.33099E-07 | -1.011710952 | 0.959742894 | 2.512452317  | 6.47089E-05 | -1.279102853 | 0.285454949 |
| DIP0597 | -2.401342101 | 0.016419656 | 1.503376478  | 0.26407373  | 1.315753693  | 0.452260311 | -1.213980433 | 0.595351586 |
| DIP0603 | -2.14180085  | 0.024755611 | 1.535260698  | 0.206291689 | 1.08077261   | 0.818882698 | -1.290810901 | 0.451777084 |
| DIP0641 | 2.000035262  | 0.001035712 | -1.051736599 | 0.808124552 | -1.148100736 | 0.508922604 | 1.6563445    | 0.01764238  |
| DIP0698 | -7.349551786 | 1.64008E-11 | -1.039350846 | 0.896378464 | 4.931472391  | 7.19019E-08 | -1.548982182 | 0.139371211 |
| DIP0703 | -2.919004431 | 0.000341716 | 1.009166461  | 0.975665563 | 2.32559388   | 0.00478076  | -1.24376425  | 0.465802633 |
| DIP0704 | -2.255765655 | 0.001351708 | 1.014808674  | 0.953818566 | 1.90703505   | 0.010988047 | -1.165604282 | 0.546066183 |
| DIP0710 | -2.109579453 | 0.000573878 | 1.003301212  | 0.98786186  | 1.947863456  | 0.002101596 | -1.079458723 | 0.724485968 |
| DIP0712 | -3.430610175 | 1.79577E-09 | 1.051947231  | 0.805213412 | 3.18007822   | 1.64901E-08 | -1.025509326 | 0.901971174 |
| DIP0736 | -3.641552226 | 1.40984E-06 | -1.01810585  | 0.946629595 | 3.931480898  | 3.23308E-07 | 1.060417031  | 0.826621111 |
| DIP0737 | -7.576854231 | 1.14216E-11 | 1.009286336  | 0.975302055 | 6.670886729  | 2.02177E-10 | -1.125358699 | 0.692066965 |
| DIP0741 | -2.220199134 | 0.000166492 | -1.03844     | 0.858696    | 2.52622704   | 1.19956E-05 | 1.095715109  | 0.665829582 |
| DIP0751 | -335.3916028 | 0           | 1.0308474    | 0.959938922 | 126.3500244  | 1.11022E-15 | -2.575031069 | 0.117017382 |
| DIP0758 | -2.481042787 | 0.0020217   | 1.625584985  | 0.098667448 | -1.184565551 | 0.565103957 | -1.807938585 | 0.04438351  |
| DIP0764 | -2.149533065 | 0.012911156 | 1.002920193  | 0.99244119  | 1.140921755  | 0.668473613 | -1.878546254 | 0.040559098 |
| DIP0786 | -2.624095394 | 6.36312E-05 | 1.015664363  | 0.948656406 | 2.063798453  | 0.002686646 | -1.25187833  | 0.35181155  |
| DIP0790 | -2.092828288 | 0.011207711 | 1.013231112  | 0.963991195 | 1.766324546  | 0.050761988 | -1.169377077 | 0.591120356 |
| DIP0793 | -5.826702661 | 5.98163E-08 | 1.091065894  | 0.788800169 | 2.114152217  | 0.021387375 | -2.526013244 | 0.004379374 |
| DIP0796 | -3.388528404 | 2.32949E-06 | -1.039431421 | 0.881100125 | 2.725814619  | 0.000104839 | -1.292143226 | 0.321192422 |
| DIP0800 | -4.745328869 | 0.001497267 | 1.820575457  | 0.221812067 | -1.158910353 | 0.763633134 | -3.02069916  | 0.024188692 |
| DIP0804 | -2.486851925 | 0.004272895 | 1.082851     | 0.802863    | -1.04260017  | 0.895932202 | -2.394413844 | 0.006188144 |
| DIP0807 | -2.039709019 | 5.52223E-05 | 1.112336994  | 0.546824786 | 1.086050264  | 0.64080889  | -1.688425526 | 0.003083684 |

|         |              |             |              |             |              |             |              |             |
|---------|--------------|-------------|--------------|-------------|--------------|-------------|--------------|-------------|
| DIP0808 | -3.954658652 | 0.000694997 | 1.25225919   | 0.579020249 | 1.088735757  | 0.833963309 | -2.900629695 | 0.008636769 |
| DIP0809 | -3.015274687 | 0.00027878  | 1.613347102  | 0.115174219 | -1.161622502 | 0.621973034 | -2.171021302 | 0.010753171 |
| DIP0810 | -3.620518225 | 0.001487564 | 1.554707656  | 0.275853172 | -1.100967398 | 0.812292349 | -2.563872707 | 0.02010315  |
| DIP0811 | -5.500813563 | 2.52069E-06 | 1.09413198   | 0.804184946 | 1.015886802  | 0.965437723 | -4.948936663 | 1.06534E-05 |
| DIP0816 | -5.420051809 | 0.000224264 | 1.327219964  | 0.536616442 | -1.126383497 | 0.795109132 | -4.599883273 | 0.000867133 |
| DIP0817 | -6.274971942 | 1.64571E-05 | 1.612462613  | 0.262434406 | -1.024663729 | 0.954429395 | -3.987525725 | 0.001177107 |
| DIP0818 | 2.1099575    | 0.000839689 | -1.653064756 | 0.023600839 | 1.39142878   | 0.137973459 | 1.776007609  | 0.010420541 |
| DIP0820 | -2.679910744 | 0.003101129 | 1.254198911  | 0.496793752 | -1.055047027 | 0.872300458 | -2.254372761 | 0.014756883 |
| DIP0821 | -2.706031511 | 1.22007E-06 | -1.127150016 | 0.559998591 | 1.964543799  | 0.001016276 | -1.552575953 | 0.032123772 |
| DIP0856 | -7.342077746 | 1.23338E-11 | -1.051430192 | 0.864729769 | 4.319702626  | 6.6319E-07  | -1.787086494 | 0.04837766  |
| DIP0857 | -3.952681187 | 1.9378E-08  | -1.053156777 | 0.832592597 | 2.929379482  | 1.13889E-05 | -1.421049408 | 0.150706192 |
| DIP0878 | -2.303735761 | 0.000643528 | 1.244222013  | 0.371396346 | 1.27739281   | 0.316872002 | -1.44947362  | 0.129258855 |
| DIP0879 | -3.267311197 | 5.68824E-08 | 1.09195313   | 0.686809842 | 3.387846398  | 2.2004E-08  | 1.132236648  | 0.56887378  |
| DIP0887 | 2.067639794  | 0.000579746 | 1.063033683  | 0.767774196 | -1.407138977 | 0.101729785 | 1.562013974  | 0.036084973 |
| DIP0890 | -1.933597211 | 0.005147553 | -1.027712735 | 0.907643019 | 2.014347342  | 0.002962585 | 1.013670038  | 0.954068574 |
| DIP0901 | -3.094067353 | 3.99974E-06 | -1.01208196  | 0.960909949 | 3.306129825  | 1.04985E-06 | 1.055782493  | 0.824538604 |
| DIP0912 | -2.068837196 | 0.000580273 | 1.112451314  | 0.613776902 | 1.441796868  | 0.083416792 | -1.28985599  | 0.228781901 |
| DIP0913 | -2.143260637 | 0.004637516 | -1.125599302 | 0.66042616  | 1.727893365  | 0.04248069  | -1.396181457 | 0.215613914 |
| DIP0923 | -4.920760717 | 1.20403E-08 | -1.069107689 | 0.811194668 | 5.04344512   | 7.18818E-09 | -1.043101093 | 0.879991808 |
| DIP0956 | -4.986166837 | 6.73337E-06 | 1.014745516  | 0.967287647 | 3.697617376  | 0.00024828  | -1.328885908 | 0.42556408  |
| DIP0964 | -5.482077475 | 4.19311E-05 | 1.185437041  | 0.682154448 | 1.062389617  | 0.884177191 | -4.352941775 | 0.000398947 |
| DIP0971 | -3.098820509 | 0.000121378 | 1.073836675  | 0.808745378 | 1.003405992  | 0.990786919 | -2.875951111 | 0.000333329 |
| DIP0977 | -2.702079574 | 0.002571369 | 1.082730015  | 0.809501619 | -1.051277243 | 0.879490921 | -2.623585498 | 0.003449979 |
| DIP0987 | -2.477019493 | 1.0081E-05  | 1.031784332  | 0.878978373 | 1.835135059  | 0.003153154 | -1.308194935 | 0.191262366 |
| DIP0988 | -2.097987496 | 0.00175632  | -1.030293642 | 0.899717499 | 1.758140308  | 0.017222561 | -1.229448621 | 0.383251304 |
| DIP0994 | -2.37355788  | 0.000658461 | -1.047893634 | 0.853751094 | 1.937316116  | 0.009179983 | -1.283856659 | 0.324872858 |
| DIP1004 | -3.005219778 | 3.5006E-05  | -1.096801795 | 0.728337606 | 3.158846759  | 1.5258E-05  | -1.043460066 | 0.872853545 |
| DIP1029 | -2.31937968  | 0.000199635 | -1.104273314 | 0.66125218  | 1.618306269  | 0.033859554 | -1.5826603   | 0.04285676  |
| DIP1030 | -3.176536138 | 6.91198E-07 | 1.03431178   | 0.884863468 | 2.575220011  | 4.87225E-05 | -1.192581288 | 0.449257031 |
| DIP1031 | -3.169532228 | 4.46651E-06 | -1.022206588 | 0.930402194 | 2.573969853  | 0.000169938 | -1.258723648 | 0.360029794 |
| DIP1032 | -2.629556003 | 8.76901E-05 | 1.128360917  | 0.624177956 | 1.879230483  | 0.010487492 | -1.240093243 | 0.382664257 |
| DIP1120 | -43.69863978 | 0           | -1.0015018   | 0.996548905 | 69.26156015  | 0           | 1.582605305  | 0.184357957 |
| DIP1121 | -22.26098163 | 0           | 1.197971386  | 0.482361716 | 48.41557192  | 0           | 2.605476735  | 0.000163654 |
| DIP1155 | -2.15980454  | 0.016235277 | -1.143658504 | 0.675273815 | 1.62504359   | 0.130041908 | -1.520007736 | 0.191607296 |
| DIP1157 | -4.106976924 | 4.28973E-06 | -1.152908654 | 0.643515066 | 3.159983796  | 0.000182057 | -1.49841567  | 0.188139858 |

|         |              |             |              |             |              |             |              |             |
|---------|--------------|-------------|--------------|-------------|--------------|-------------|--------------|-------------|
| DIP1204 | -2.152632927 | 3.50272E-05 | -1.100602522 | 0.604971074 | 2.141210421  | 4.01012E-05 | -1.106473798 | 0.585151995 |
| DIP1225 | -2.166001463 | 1.16033E-05 | -1.06823807  | 0.708057001 | 2.36886334   | 9.93794E-07 | 1.023795485  | 0.893848133 |
| DIP1295 | -2.846191315 | 0.000875441 | -1.080127784 | 0.806305555 | 2.573717395  | 0.002635483 | -1.194478587 | 0.571801623 |
| DIP1296 | -3.257324922 | 0.000351286 | 1.437955753  | 0.271613163 | 1.596822821  | 0.15661237  | -1.418596319 | 0.289896634 |
| DIP1364 | -3.68379778  | 5.82709E-11 | -1.148984557 | 0.486887193 | 3.302490743  | 2.12465E-09 | -1.281646821 | 0.212173286 |
| DIP1392 | -2.390366309 | 0.010394882 | 1.337663312  | 0.392289933 | 1.043577554  | 0.900193995 | -1.712351481 | 0.11378504  |
| DIP1393 | -2.175631144 | 0.000321058 | -1.132063112 | 0.566031361 | 1.849432718  | 0.004483747 | -1.331733639 | 0.185313027 |
| DIP1417 | -2.873773489 | 9.79443E-05 | -1.041556086 | 0.880582333 | 2.042963017  | 0.008393504 | -1.465125037 | 0.158711464 |
| DIP1419 | -3.206589981 | 3.00369E-06 | -1.038288712 | 0.880371683 | 3.368314718  | 1.13194E-06 | 1.011698484  | 0.962793531 |
| DIP1425 | -2.401258838 | 0.002600473 | 1.065661108  | 0.826943831 | 1.002130953  | 0.994164256 | -2.248512901 | 0.005368667 |
| DIP1525 | 2.369051252  | 0.002260971 | -1.303458688 | 0.344945789 | -1.460021667 | 0.179223162 | 1.244852467  | 0.439938752 |
| DIP1526 | 2.167622049  | 7.83759E-05 | -1.162875674 | 0.437523366 | -1.29870936  | 0.180389186 | 1.435285523  | 0.066112687 |
| DIP1570 | -3.940584392 | 9.6857E-06  | -1.046215936 | 0.884176801 | 2.345195433  | 0.005987741 | -1.75793545  | 0.068751562 |
| DIP1607 | -3.334725226 | 3.68419E-05 | 1.07635473   | 0.801003055 | 1.626158782  | 0.095851821 | -1.905204867 | 0.027234298 |
| DIP1628 | -1.951292911 | 0.009370763 | -1.084388681 | 0.752811856 | 2.076049618  | 0.00452586  | -1.019224168 | 0.941014555 |
| DIP1631 | -2.711141408 | 8.00906E-06 | 1.054411481  | 0.812600834 | 2.302902278  | 0.000188448 | -1.11652007  | 0.621582    |
| DIP1646 | -3.02324586  | 6.22289E-07 | 1.178068543  | 0.460442222 | 1.961052127  | 0.002414759 | -1.308620651 | 0.225545147 |
| DIP1660 | -6.409166681 | 8.65974E-15 | -1.121418276 | 0.633842016 | 5.383527351  | 2.28317E-12 | -1.335064574 | 0.226265719 |
| DIP1668 | -3.577003263 | 3.33904E-08 | 1.111282786  | 0.648176785 | 2.181120275  | 0.00073903  | -1.47575796  | 0.091512581 |
| DIP1685 | -1.941377955 | 0.018123076 | 1.004948177  | 0.985970466 | -1.167650719 | 0.581113685 | -2.255689813 | 0.003785588 |
| DIP1688 | -3.27476447  | 0.000850174 | -1.045298286 | 0.900884604 | 2.779114113  | 0.004054753 | -1.231725488 | 0.557750249 |
| DIP1710 | -5.549005069 | 1.34673E-07 | 1.046679755  | 0.888467846 | 2.066628333  | 0.02565133  | -2.565304471 | 0.003749012 |
| DIP1732 | -4.379036452 | 6.98177E-10 | -1.192178636 | 0.463387898 | 2.771851651  | 2.10659E-05 | -1.883431859 | 0.008200214 |
| DIP1771 | -4.58808858  | 7.17514E-05 | 1.01140335   | 0.97643559  | -1.177208688 | 0.671177829 | -5.3402411   | 1.29333E-05 |
| DIP1778 | 2.203711105  | 0.000745232 | -1.059096903 | 0.803768203 | -1.361604066 | 0.184339336 | 1.52815748   | 0.072010294 |
| DIP1810 | -2.914230322 | 0.003908958 | 1.113695336  | 0.771450309 | -1.10882992  | 0.780581845 | -2.901498886 | 0.004072351 |
| DIP1824 | -4.163397446 | 0.001287419 | 1.347153214  | 0.501291746 | -1.056219126 | 0.901775732 | -3.264261234 | 0.007595712 |
| DIP1825 | -2.892990053 | 0.009007464 | 1.590519103  | 0.253881736 | -1.277541506 | 0.547057199 | -2.323716114 | 0.038183852 |
| DIP1834 | -4.286474608 | 0.000123299 | 1.035628759  | 0.926433646 | -1.030110266 | 0.937664043 | -4.26363353  | 0.000131486 |
| DIP1836 | -3.296286006 | 0.001187724 | 1.760378696  | 0.124282628 | -1.100760222 | 0.794164824 | -2.061159071 | 0.049343269 |
| DIP1850 | -4.977077619 | 5.0293E-06  | 1.097276551  | 0.791946531 | 1.276253841  | 0.488534275 | -3.554031338 | 0.000314109 |
| DIP1855 | -4.307194609 | 0.000217213 | 1.576478451  | 0.249023752 | 1.04801775   | 0.905463812 | -2.60698071  | 0.01524876  |
| DIP1890 | -1.818201126 | 0.017076924 | -1.047166531 | 0.854086767 | 2.354063025  | 0.000634482 | 1.236404026  | 0.397212749 |
| DIP1903 | -2.86656684  | 0.000860358 | 1.015057109  | 0.962282762 | -1.009638686 | 0.975796207 | -2.85126497  | 0.000919052 |
| DIP1922 | -2.957163604 | 3.21137E-05 | 1.054362251  | 0.839158399 | 1.794090667  | 0.025035142 | -1.563295641 | 0.086669473 |

|          |              |             |              |             |              |             |              |             |
|----------|--------------|-------------|--------------|-------------|--------------|-------------|--------------|-------------|
| DIP1936  | -2.369228041 | 0.000392619 | 1.094788807  | 0.709739289 | 1.412073124  | 0.156239155 | -1.532566501 | 0.079390733 |
| DIP1949  | -5.525139064 | 4.80957E-06 | 1.760804092  | 0.130158547 | 1.075067226  | 0.846475254 | -2.918747676 | 0.004163738 |
| DIP1960  | -3.108070568 | 1.22448E-06 | -1.005491802 | 0.981310821 | 2.283178315  | 0.000413527 | -1.36876715  | 0.179251577 |
| DIP1961  | -3.98258473  | 5.65207E-08 | -1.054765298 | 0.834292736 | 3.076665539  | 1.02353E-05 | -1.365339234 | 0.220875923 |
| DIP1970  | -2.460189524 | 0.003201843 | 1.069604581  | 0.825618708 | 1.1769022    | 0.593941467 | -1.954361667 | 0.028295495 |
| DIP1984  | -2.792897766 | 0.000242494 | -1.030125966 | 0.915567139 | 2.055129176  | 0.01009062  | -1.399929768 | 0.22936551  |
| DIP1999  | -5.753953876 | 5.93917E-06 | 1.52913386   | 0.271777062 | 1.202639371  | 0.633045924 | -3.128855121 | 0.003159482 |
| DIP2000  | -3.684236912 | 0.000161606 | 1.913274332  | 0.060507073 | 1.063170042  | 0.859343362 | -1.811204855 | 0.0857418   |
| DIP2004  | -1.791336529 | 0.05363682  | 1.004929934  | 0.987009217 | -1.170033994 | 0.603418842 | -2.085642554 | 0.01504419  |
| DIP2014  | -3.159592849 | 0.00071858  | 1.107951106  | 0.763123737 | 1.963350151  | 0.047317649 | -1.452488715 | 0.272436593 |
| DIP2017  | -2.152581377 | 0.003432546 | 1.237958955  | 0.415207532 | 1.125303818  | 0.652319198 | -1.545195878 | 0.096788917 |
| DIP2018  | -8.074365649 | 0           | 1.005379413  | 0.978881578 | 7.727641131  | 0           | -1.039277391 | 0.846635787 |
| DIP2019  | -14.55174547 | 0           | -1.059573889 | 0.842694111 | 15.24416146  | 0           | -1.011446223 | 0.968768569 |
| DIP2021  | 2.101496756  | 0.011119208 | -1.087271804 | 0.771164096 | -1.130853914 | 0.670989066 | 1.709165401  | 0.068552538 |
| DIP2025  | -5.181748982 | 2.19815E-05 | 1.529678002  | 0.272900901 | 1.446194591  | 0.341274882 | -2.342338283 | 0.028120206 |
| DIP2032  | -2.501537521 | 4.4724E-05  | -1.053043412 | 0.818085629 | 2.238520036  | 0.000335818 | -1.176771957 | 0.468711428 |
| DIP2036  | -2.868719482 | 7.87019E-05 | -1.081618107 | 0.768864723 | 2.894090242  | 6.86855E-05 | -1.072136207 | 0.794094685 |
| DIP2043  | -3.407878473 | 7.66934E-05 | 1.1513192    | 0.649554894 | 1.086697973  | 0.78873687  | -2.723826839 | 0.001238073 |
| DIP2067  | -4.064892449 | 0.000103875 | 1.497239673  | 0.263971047 | -1.017011261 | 0.962770486 | -2.76110864  | 0.004945778 |
| DIP2076  | -4.900573299 | 9.09911E-05 | 1.269953858  | 0.556361765 | 1.116637146  | 0.786048055 | -3.455786287 | 0.002272512 |
| DIP2077  | -5.689335651 | 0.001266542 | 1.117920593  | 0.8366077   | 1.055888505  | 0.920086231 | -4.819839071 | 0.003643055 |
| DIP2077A | -3.301680356 | 0.001089058 | 1.150295178  | 0.701885668 | 1.020406973  | 0.956018008 | -2.812887149 | 0.004736121 |
| DIP2093  | -3.013113518 | 0.041424626 | -1.112073905 | 0.844299969 | 2.449586933  | 0.097637845 | -1.367906104 | 0.562443212 |
| DIP2098  | -3.174084359 | 0.001126404 | 1.067273033  | 0.854348914 | -1.008302312 | 0.981406692 | -2.99870464  | 0.001963431 |
| DIP2116  | -2.119280823 | 0.003871374 | -1.070613972 | 0.793009214 | 1.63323209   | 0.059250542 | -1.389227942 | 0.206187999 |
| DIP2126  | -2.552673745 | 0.005507342 | 1.345884988  | 0.378928381 | 1.080845187  | 0.817888825 | -1.754784823 | 0.095808817 |
| DIP2133  | -2.051836485 | 0.01753739  | 1.280320533  | 0.414110076 | -1.01567554  | 0.959006867 | -1.627717495 | 0.107429223 |
| DIP2134  | -3.093264767 | 3.11093E-08 | 1.077636679  | 0.714150667 | 1.745276399  | 0.006386559 | -1.644676602 | 0.014772385 |
| DIP2158  | -3.043733401 | 0.002931116 | 1.159713115  | 0.692101935 | -1.014823373 | 0.968634257 | -2.663461984 | 0.008848005 |
| DIP2184  | -2.448482862 | 0.003264224 | 1.254468329  | 0.456383767 | -1.090001039 | 0.777155602 | -2.127474089 | 0.013167615 |
| DIP2190  | -2.332321025 | 0.000551934 | 1.045005355  | 0.857498552 | 2.290716665  | 0.000722315 | 1.026364363  | 0.915465901 |
| DIP2228  | -3.652517446 | 6.95178E-05 | 1.630949311  | 0.133060005 | 1.446029463  | 0.257297849 | -1.54872637  | 0.179109864 |
| DIP2250  | -2.365424139 | 0.003647997 | 1.057781796  | 0.849561088 | 1.022515756  | 0.940095942 | -2.186970512 | 0.008265646 |
| DIP2265  | -2.085939662 | 0.00015478  | 1.124764054  | 0.54500203  | 1.501652666  | 0.036440207 | -1.235010989 | 0.277637934 |
| DIP2266  | -2.362549343 | 0.000251125 | 1.030541876  | 0.898064525 | 2.239736505  | 0.000593725 | -1.023571807 | 0.920949923 |

|         |              |             |              |             |              |             |              |             |
|---------|--------------|-------------|--------------|-------------|--------------|-------------|--------------|-------------|
| DIP2276 | -8.416845444 | 0           | 1.049881517  | 0.836230014 | 5.310733099  | 1.25888E-12 | -1.509574624 | 0.079512056 |
| DIP2281 | -2.234665255 | 0.018870207 | 1.354911368  | 0.375077794 | -1.133745419 | 0.713964469 | -1.869894634 | 0.067626574 |
| DIP2284 | -4.790908561 | 1.86677E-07 | 1.361985455  | 0.304198941 | 2.62364546   | 0.001331297 | -1.340726721 | 0.329149076 |
| DIP2287 | -4.099386121 | 0.000118911 | 1.370124756  | 0.390375608 | 1.180739417  | 0.650440845 | -2.533988567 | 0.011209645 |
| DIP2305 | -3.47325876  | 0.000263456 | 1.459840068  | 0.26755903  | 1.121225213  | 0.737396309 | -2.121968855 | 0.027476044 |
| DIP2318 | -3.477641224 | 0.032052083 | 1.659569959  | 0.383593122 | -1.087658484 | 0.885084026 | -2.279196462 | 0.156489161 |
| DIP2319 | -2.4736552   | 0.001274525 | -1.028834339 | 0.919467169 | 2.923209536  | 0.000135649 | 1.148617243  | 0.622038494 |
| DIP2321 | -2.250850936 | 0.008233253 | 1.052686041  | 0.867160559 | 1.840209739  | 0.047029556 | -1.161931552 | 0.62511084  |
| DIP2335 | -2.673593851 | 0.002146843 | 1.637956245  | 0.123529684 | -1.033610705 | 0.917829652 | -1.68713617  | 0.102651878 |
| DIP2343 | -3.868057813 | 9.61905E-05 | 1.183756382  | 0.626756682 | 1.022521263  | 0.948821205 | -3.195643141 | 0.000812072 |
| DIP2370 | -2.030784889 | 0.039180217 | 1.081918851  | 0.818700951 | 1.036958605  | 0.915867661 | -1.810121871 | 0.084127328 |
| dirA    | -4.98953835  | 5.24219E-09 | -1.061779104 | 0.827742298 | 5.315653207  | 1.29392E-09 | 1.003372285  | 0.990235539 |
| dnaK    | -2.013420618 | 0.004678301 | -1.030925035 | 0.902029061 | 2.065548145  | 0.00337041  | -1.004907935 | 0.98421402  |
| dnaX    | -3.686504717 | 0.000526532 | 1.398942115  | 0.37235025  | -1.014518773 | 0.969447949 | -2.673468905 | 0.008975874 |
| dtxR    | -2.371523288 | 4.224E-05   | 1.009125367  | 0.965642841 | 1.713418764  | 0.010699061 | -1.371572446 | 0.134213364 |
| efp     | -2.023833711 | 0.001383494 | -1.066023171 | 0.771764125 | 1.941959491  | 0.002611773 | -1.110967372 | 0.63322419  |
| eno     | -2.283795533 | 8.81983E-05 | 1.046198846  | 0.83020036  | 2.12092649   | 0.000356864 | -1.029241683 | 0.891149784 |
| fba     | -4.739685915 | 4.02232E-10 | -1.041620134 | 0.869921285 | 3.575461145  | 3.07721E-07 | -1.380787563 | 0.194564691 |
| fumC    | -3.48497706  | 2.56032E-05 | 1.027029078  | 0.928360046 | 2.325350402  | 0.004442528 | -1.459246898 | 0.202563848 |
| fusA    | -4.342039456 | 2.8622E-05  | -1.059071065 | 0.870112313 | 5.481728422  | 1.2456E-06  | 1.19206146   | 0.616581362 |
| gap     | -7.458019766 | 1.20237E-13 | 1.037247496  | 0.89268582  | 5.153539314  | 1.43657E-09 | -1.395197025 | 0.218768929 |
| glpD    | -4.797299166 | 1.26759E-07 | 1.229069927  | 0.487110451 | 2.048014826  | 0.015721559 | -1.905842967 | 0.029772408 |
| glpF    | -3.123811127 | 4.59751E-07 | 1.148522383  | 0.539938916 | 1.837452265  | 0.007088184 | -1.480230126 | 0.082537039 |
| glpK    | -4.648748963 | 1.39387E-07 | 1.001659942  | 0.995466109 | 2.951526919  | 0.000208398 | -1.572421742 | 0.120817691 |
| gltA    | -3.012835411 | 0.000468008 | 1.026963738  | 0.932745379 | 2.202080203  | 0.0122842   | -1.332254407 | 0.362824696 |
| glyS    | -2.217517916 | 0.002966143 | -1.042148036 | 0.877591154 | 1.697667318  | 0.048363565 | -1.361269028 | 0.249965667 |
| gntP    | -3.539742977 | 0.000692422 | 1.383697443  | 0.383426216 | 1.079836708  | 0.836687883 | -2.369040599 | 0.020631898 |
| gpmA    | -2.102496876 | 0.003488668 | -1.039691945 | 0.87838895  | 1.82988616   | 0.017564937 | -1.194581998 | 0.484752094 |
| groES   | -2.210164238 | 0.000670128 | -1.02809714  | 0.905397158 | 2.447184083  | 0.000122948 | 1.07698075   | 0.750308276 |
| infA    | -4.496410714 | 4.47757E-10 | 1.182926017  | 0.486176174 | 3.988816798  | 9.42455E-09 | 1.049387048  | 0.841341479 |
| infB    | -2.367993692 | 0.010062169 | 1.157017759  | 0.663242169 | 1.213357447  | 0.563710048 | -1.686754029 | 0.118589037 |
| infC    | -4.541302793 | 2.15329E-08 | -1.081066177 | 0.773287606 | 4.724110791  | 9.28659E-09 | -1.039232369 | 0.886673148 |
| irp6B   | -2.933253746 | 0.003009209 | 1.154885654  | 0.691372684 | 1.014310216  | 0.968761066 | -2.504031846 | 0.011406314 |
| lldP    | -2.839588591 | 0.00011797  | 1.152850589  | 0.599763678 | 2.086616731  | 0.006655462 | -1.180428568 | 0.540554828 |
| lpd     | -3.426092778 | 3.28817E-05 | -1.054304803 | 0.858511162 | 2.45389363   | 0.002475602 | -1.472005969 | 0.192294366 |



|       |              |             |              |             |              |             |              |             |
|-------|--------------|-------------|--------------|-------------|--------------|-------------|--------------|-------------|
| mdh   | -3.823961644 | 7.77598E-06 | 1.072508373  | 0.815536267 | 2.377748988  | 0.003890415 | -1.499501244 | 0.176803319 |
| menB  | -2.5211944   | 0.004139309 | 1.048651726  | 0.882897601 | 1.089194175  | 0.791155128 | -2.207342615 | 0.014120845 |
| mihF  | -2.222246605 | 2.50696E-05 | 1.044268603  | 0.819112602 | 1.752795526  | 0.003072992 | -1.214084108 | 0.306351159 |
| mmdA  | -3.036473487 | 6.36386E-07 | 1.032406173  | 0.88632875  | 2.516304553  | 3.5195E-05  | -1.1688417   | 0.484172724 |
| mscL  | -2.053682653 | 1.02512E-05 | -1.000612782 | 0.997001748 | 1.905166003  | 7.76714E-05 | -1.078615254 | 0.642885186 |
| msrA  | -2.353366469 | 0.000164258 | 1.077468857  | 0.742491246 | 1.747757653  | 0.013961774 | -1.249693821 | 0.326423355 |
| opuBB | -5.672244686 | 5.23392E-06 | 1.125414448  | 0.756575682 | -1.072580187 | 0.854245599 | -5.40595269  | 9.5991E-06  |
| pbpA  | -2.301633308 | 0.002001995 | -1.022843457 | 0.933280831 | 1.163313918  | 0.575236217 | -2.023710481 | 0.009018776 |
| pccB2 | -2.756399486 | 7.56113E-05 | 1.119719351  | 0.658925385 | 2.164403495  | 0.002577269 | -1.137351618 | 0.615381005 |
| pheA  | -3.247046142 | 0.001136619 | 1.426509298  | 0.326313516 | 1.051420472  | 0.8898126   | -2.164897927 | 0.032838845 |
| pknA  | -3.713335502 | 0.000140053 | 1.083892799  | 0.815148772 | 1.141221321  | 0.701559825 | -3.001981294 | 0.001424795 |
| ppiA  | -2.18662409  | 0.00031752  | 1.02473331   | 0.910460491 | 1.901699337  | 0.00309736  | -1.122073794 | 0.596127448 |
| ptsG  | -1.34968397  | 0.237988899 | -1.001415724 | 0.995556698 | 2.131491401  | 0.002890775 | 1.577019592  | 0.0730392   |
| pyc   | -2.371868713 | 0.003242509 | -1.009527122 | 0.974218418 | 1.907592825  | 0.027723504 | -1.25522898  | 0.438479625 |
| pycB  | -2.84459542  | 0.00025315  | 1.01209517   | 0.966437867 | 2.234060699  | 0.004904593 | -1.258068202 | 0.421655556 |
| pyrR  | -4.131034803 | 5.1393E-05  | 1.648484113  | 0.15363677  | 1.29845594   | 0.455966688 | -1.929953612 | 0.060542577 |
| qcrA  | -2.739638417 | 1.34698E-05 | -1.039151614 | 0.868303405 | 2.714808169  | 1.61273E-05 | -1.048655929 | 0.83741405  |
| qcrB  | -2.547871525 | 0.001071211 | -1.091317061 | 0.759904626 | 2.940182185  | 0.000161972 | 1.057415742  | 0.845175967 |
| qcrC  | -4.671463467 | 6.99567E-08 | -1.01983137  | 0.945280451 | 3.928524681  | 1.71469E-06 | -1.2126957   | 0.499812173 |
| rplA  | -2.268583339 | 0.000366453 | -1.024995032 | 0.914485053 | 2.461275114  | 8.92736E-05 | 1.058482452  | 0.804715361 |
| rplB  | -5.095251282 | 5.27933E-12 | 1.089091696  | 0.717931414 | 5.630244287  | 2.45026E-13 | 1.203444533  | 0.432304604 |
| rplC  | -15.77584333 | 0           | 1.141113501  | 0.68245311  | 11.86887494  | 1.62093E-14 | -1.164807577 | 0.635452655 |
| rplD  | -7.549167975 | 5.38458E-14 | 1.034443452  | 0.899863143 | 8.207959926  | 4.77396E-15 | 1.124716052  | 0.661429542 |
| rplE  | -8.201487838 | 3.87829E-11 | -1.007582128 | 0.981094223 | 8.034332466  | 6.04069E-11 | -1.02854501  | 0.929505628 |
| rplF  | -6.274057782 | 1.18785E-11 | -1.012430938 | 0.96364752  | 7.409357784  | 1.41331E-13 | 1.166451389  | 0.56929578  |
| rplI  | -8.662812343 | 2.72005E-14 | 1.043555421  | 0.880749466 | 8.181309548  | 1.28453E-13 | -1.014660055 | 0.959017446 |
| rplJ  | -5.286858638 | 1.2606E-11  | 1.122723618  | 0.638013662 | 4.96850507   | 6.98752E-11 | 1.055117673  | 0.827115923 |
| rplK  | -3.562056439 | 2.12879E-08 | 1.035381916  | 0.878267066 | 3.838687942  | 2.99698E-09 | 1.115790315  | 0.628666005 |
| rplL  | -4.775204454 | 7.3479E-12  | -1.074144491 | 0.754709393 | 6.270504995  | 8.88178E-16 | 1.222497112  | 0.377416152 |
| rplM  | -15.62603195 | 0           | 1.043936327  | 0.892659004 | 13.66182581  | 2.22045E-16 | -1.095635143 | 0.773441841 |
| rplN  | -7.322796851 | 3.1858E-10  | 1.15067817   | 0.657828846 | 5.697175613  | 3.87633E-08 | -1.117026575 | 0.726373547 |
| rplO  | -3.825609614 | 8.03673E-08 | 1.205332397  | 0.455391063 | 3.395780177  | 9.99855E-07 | 1.069906309  | 0.786741003 |
| rplP  | -4.231861263 | 2.50807E-09 | 1.269399048  | 0.324686536 | 3.642584888  | 9.06717E-08 | 1.092638322  | 0.713934591 |
| rplQ  | -3.095986667 | 0.000146395 | 1.136341026  | 0.667663081 | 3.295026376  | 6.13325E-05 | 1.209395923  | 0.522746232 |
| rplR  | -10.77493958 | 0           | 1.010902051  | 0.969567046 | 12.7813859   | 0           | 1.199146327  | 0.520311491 |

|       |              |             |              |             |             |             |              |             |
|-------|--------------|-------------|--------------|-------------|-------------|-------------|--------------|-------------|
| rplS  | -5.476817258 | 5.69534E-09 | -1.096517519 | 0.752650987 | 4.622245207 | 1.59781E-07 | -1.299244372 | 0.369391513 |
| rplT  | -2.26609086  | 0.00036733  | -1.029262226 | 0.900055716 | 2.733929392 | 1.17666E-05 | 1.17215202   | 0.48886252  |
| rplU  | -3.614022306 | 6.60852E-07 | 1.106218885  | 0.696202238 | 3.67841488  | 4.60442E-07 | 1.125928857  | 0.645925445 |
| rplV  | -3.149913215 | 5.24391E-09 | 1.035624136  | 0.858840517 | 4.373949681 | 5.50671E-14 | 1.438061162  | 0.06370316  |
| rplW  | -6.674427666 | 1.11022E-16 | 1.003800288  | 0.986765364 | 8.381157941 | 0           | 1.260483919  | 0.30615983  |
| rplX  | -7.718635884 | 4.15223E-14 | -1.043311714 | 0.875781376 | 8.628545236 | 1.66533E-15 | 1.071477221  | 0.798060884 |
| rpmA  | -4.643159593 | 2.91042E-07 | -1.109256492 | 0.729937223 | 6.284216273 | 8.44438E-10 | 1.22012839   | 0.505091469 |
| rpmB2 | -4.05642385  | 9.23977E-10 | 1.045947567  | 0.844445441 | 4.462471898 | 6.15916E-11 | 1.150646924  | 0.539114386 |
| rpmC  | -5.763654655 | 5.09658E-10 | 1.121605007  | 0.684988492 | 7.762585421 | 3.34843E-13 | 1.510596175  | 0.141248626 |
| rpmD  | -6.035293749 | 2.79582E-09 | -1.004374358 | 0.988542678 | 9.37158455  | 1.38112E-13 | 1.54603385   | 0.14772855  |
| rpmE  | -3.06022222  | 4.11281E-05 | -1.040513299 | 0.884310227 | 3.991221097 | 3.86062E-07 | 1.253444725  | 0.407096519 |
| rpmG  | -2.660453156 | 1.24961E-06 | -1.110965284 | 0.602597346 | 4.047415074 | 4.24372E-12 | 1.36937262   | 0.118789883 |
| rpmH  | -8.347743752 | 4.44089E-16 | 1.069362039  | 0.800205633 | 8.169769974 | 8.88178E-16 | 1.046563255  | 0.859381732 |
| rpmI  | -2.365330908 | 0.001178459 | 1.062892104  | 0.818207344 | 2.6494869   | 0.000237656 | 1.190581283  | 0.5105905   |
| rpoA  | -3.921047177 | 4.87012E-06 | 1.026195306  | 0.931096016 | 5.019667329 | 6.78221E-08 | 1.313720243  | 0.361227539 |
| rpoB  | -3.908553426 | 6.80707E-06 | 1.015227158  | 0.960219512 | 3.717503947 | 1.46328E-05 | -1.035622286 | 0.908008909 |
| rpoC  | -3.303161323 | 4.3029E-05  | -1.014983895 | 0.959396067 | 3.308625654 | 4.20006E-05 | -1.013307607 | 0.963899782 |
| rpsA  | -5.95580289  | 1.02902E-08 | -1.086229384 | 0.790771473 | 7.080814989 | 3.37438E-10 | 1.094514159  | 0.77189995  |
| rpsB  | -5.868390512 | 6.51257E-11 | -1.042669647 | 0.877531402 | 6.924147787 | 9.25371E-13 | 1.13161994   | 0.647883814 |
| rpsC  | -6.729346625 | 1.71161E-09 | 1.487655654  | 0.209653802 | 2.561455485 | 0.002962821 | -1.765971414 | 0.072304963 |
| rpsD  | -3.973706718 | 2.59427E-08 | 1.12814022   | 0.626775929 | 4.337133387 | 3.19811E-09 | 1.231317498  | 0.400847485 |
| rpsE  | -5.589576059 | 7.94605E-10 | 1.015302553  | 0.956786724 | 6.389426067 | 3.51269E-11 | 1.160589019  | 0.594482719 |
| rpsF  | -5.727736967 | 1.25164E-09 | 1.012598565  | 0.96528432  | 5.485947389 | 3.17118E-09 | -1.031084172 | 0.915095756 |
| rpsG  | -2.821360921 | 1.6827E-08  | -1.054742655 | 0.772082486 | 3.8717498   | 1.76414E-13 | 1.30107438   | 0.1517855   |
| rpsH  | -8.568405063 | 1.06093E-12 | 1.221229186  | 0.507950639 | 7.140565385 | 7.09417E-11 | 1.017723461  | 0.953499379 |
| rpsI  | -16.77153515 | 0           | 1.092817288  | 0.774327925 | 14.34082523 | 0           | -1.070165921 | 0.825674032 |
| rpsJ  | -10.12643057 | 2.77556E-15 | -1.065933871 | 0.827831503 | 9.982498799 | 4.21885E-15 | -1.081302944 | 0.789431155 |
| rpsK  | -3.399783423 | 3.89745E-08 | 1.079513905  | 0.731313374 | 4.177021953 | 1.33892E-10 | 1.326306036  | 0.204258744 |
| rpsL  | -4.544770253 | 1.13975E-07 | -1.018547263 | 0.948754404 | 5.598594881 | 1.60981E-09 | 1.209444442  | 0.504745271 |
| rpsM  | -9.083345014 | 8.60201E-13 | 1.013848535  | 0.964511717 | 11.04374779 | 7.10543E-15 | 1.232661261  | 0.497078742 |
| rpsN  | -5.17162805  | 3.60583E-11 | 1.012147975  | 0.96126698  | 6.759859398 | 1.37668E-14 | 1.322983388  | 0.2587394   |
| rpsP  | -3.646323789 | 2.5439E-09  | -1.088007884 | 0.698144823 | 4.289077564 | 2.02739E-11 | 1.081126785  | 0.719024432 |
| rpsQ  | -2.042070169 | 0.004645262 | -1.031166401 | 0.903119542 | 2.894227218 | 2.46105E-05 | 1.374463492  | 0.206921132 |
| rpsR2 | -4.794452701 | 1.25729E-10 | 1.0272713    | 0.912413963 | 6.417551587 | 2.32037E-14 | 1.375040484  | 0.189370857 |
| rpsS  | -3.384621047 | 1.80684E-09 | -1.000051941 | 0.999795932 | 4.481466869 | 1.33449E-13 | 1.323998772  | 0.165275379 |

|       |              |             |              |             |              |             |              |             |
|-------|--------------|-------------|--------------|-------------|--------------|-------------|--------------|-------------|
| rpsT  | -3.415645681 | 1.43444E-11 | -1.031750181 | 0.863969036 | 3.282075058  | 6.61614E-11 | -1.073739323 | 0.694976279 |
| sigC  | -6.20879979  | 2.59526E-06 | 1.06418425   | 0.872820967 | 1.301707539  | 0.497592487 | -4.482057345 | 0.000113221 |
| slpA  | -2.708782112 | 8.54043E-06 | -1.02225773  | 0.921685559 | 2.649480534  | 1.34855E-05 | -1.045138252 | 0.843642914 |
| sodA  | -3.861767607 | 4.04196E-08 | -1.018179646 | 0.941703158 | 3.865011892  | 3.98347E-08 | -1.017324988 | 0.944328685 |
| ssb1  | -9.806753813 | 2.14273E-14 | 1.034056132  | 0.91087999  | 8.754553311  | 3.86913E-13 | -1.083296069 | 0.788609323 |
| tatA  | -5.349919976 | 1.82129E-08 | -1.080900275 | 0.794667482 | 3.972978175  | 3.79118E-06 | -1.455515163 | 0.207045927 |
| tnpA2 | 2.198496068  | 2.63168E-05 | -1.05564473  | 0.770436253 | -1.20938239  | 0.307403271 | 1.722044098  | 0.003858205 |
| tpiA  | -1.814980122 | 0.011150392 | -1.130193214 | 0.60221835  | 2.208380793  | 0.000742248 | 1.076587648  | 0.753397703 |
| trpD  | -2.589046912 | 0.002004566 | 1.090126631  | 0.779280727 | -1.130180532 | 0.691171762 | -2.684174786 | 0.001349231 |
| trxA  | -2.165770333 | 0.002192015 | -1.022674957 | 0.929182238 | 2.223280484  | 0.001540172 | 1.003793165  | 0.988027399 |
| trxB  | -3.757163199 | 3.46716E-08 | 1.032301694  | 0.894650256 | 2.895958678  | 9.40688E-06 | -1.256785204 | 0.340732028 |
| tsf   | -2.024530667 | 0.00039519  | 1.026651611  | 0.894845734 | 2.201808967  | 7.29089E-05 | 1.116550498  | 0.579675887 |
| tuf   | -13.74492605 | 4.34947E-07 | 1.017568284  | 0.973216148 | 12.69486346  | 9.60134E-07 | -1.064022499 | 0.904746421 |

Red letter represented >2-fold change or  $P < 0.05$ .

Table S34. Genes with increased (>2-fold) and decreased (>5-fold) expression level ( $P < 0.05$ ) on VBNC vs Culturable.

| Name    | Description                                      | Fold change | P-value  |
|---------|--------------------------------------------------|-------------|----------|
| DIP0751 | Uncharacterized protein                          | -335.39     | 0.00E+00 |
| DIP1120 | Uncharacterized protein                          | -43.70      | 0.00E+00 |
| DIP1121 | Uncharacterized protein                          | -22.26      | 0.00E+00 |
| rpsI    | 30S ribosomal protein S9                         | -16.77      | 0.00E+00 |
| rplC    | 50S ribosomal protein L3                         | -15.78      | 0.00E+00 |
| rplM    | 50S ribosomal protein L13                        | -15.63      | 0.00E+00 |
| DIP2019 | PorH family porin                                | -14.55      | 0.00E+00 |
| DIP0093 | Putative membrane protein                        | -13.82      | 3.60E-11 |
| tuf     | elongation factor Tu                             | -13.74      | 4.35E-07 |
| rplR    | 50S ribosomal protein L18                        | -10.77      | 0.00E+00 |
| rpsJ    | 30S ribosomal protein S10                        | -10.13      | 2.78E-15 |
| ssb1    | Single-stranded DNA-binding protein (SSB)        | -9.81       | 2.14E-14 |
| rpsM    | 30S ribosomal protein S13                        | -9.08       | 8.60E-13 |
| rplI    | 50S ribosomal protein L9                         | -8.66       | 2.72E-14 |
| rpsH    | 30S ribosomal protein S8                         | -8.57       | 1.06E-12 |
| DIP2276 | universal stress protein                         | -8.42       | 0.00E+00 |
| rpmH    | 50S ribosomal protein L34                        | -8.35       | 4.44E-16 |
| rplE    | 50S ribosomal protein L5                         | -8.20       | 3.88E-11 |
| DIP2018 | hypothetical protein                             | -8.07       | 0.00E+00 |
| cspA    | Cold-shock protein                               | -7.85       | 1.44E-14 |
| rplX    | 50S ribosomal protein L24                        | -7.72       | 4.15E-14 |
| DIP0737 | DUF418 domain-containing protein                 | -7.58       | 1.14E-11 |
| rplD    | 50S ribosomal protein L4                         | -7.55       | 5.38E-14 |
| gap     | type I glyceraldehyde-3-phosphate dehydrogenase  | -7.46       | 1.20E-13 |
| DIP0698 | ribosome-associated translation inhibitor RaiA   | -7.35       | 1.64E-11 |
| DIP0856 | trypsin-like peptidase domain-containing protein | -7.34       | 1.23E-11 |
| rplN    | 50S ribosomal protein L14                        | -7.32       | 3.19E-10 |
| DIP0240 | Ig-like domain repeat protein                    | -7.11       | 1.41E-05 |
| DIP0252 | tRNA glutamyl-Q(34) synthetase GluQRS            | -7.02       | 5.42E-06 |
| rpsC    | 30S ribosomal protein S3                         | -6.73       | 1.71E-09 |
| rplW    | 50S ribosomal protein L23                        | -6.67       | 1.11E-16 |
| DIP1660 | CsbD family protein                              | -6.41       | 8.66E-15 |
| DIP0817 | site-specific integrase                          | -6.27       | 1.65E-05 |

|         |                                                                 |       |          |
|---------|-----------------------------------------------------------------|-------|----------|
| rpIF    | 50S ribosomal protein L6                                        | -6.27 | 1.19E-11 |
| sigC    | Putative RNA polymerase sigma factor                            | -6.21 | 2.60E-06 |
| DIP0153 | hypothetical protein                                            | -6.06 | 3.84E-06 |
| rpmD    | 50S ribosomal protein L30                                       | -6.04 | 2.80E-09 |
| rpsA    | 30S ribosomal protein S1                                        | -5.96 | 1.03E-08 |
| rpsB    | 30S ribosomal protein S2                                        | -5.87 | 6.51E-11 |
| DIP0793 | DUF1906 domain-containing protein                               | -5.83 | 5.98E-08 |
| DIP0063 | HAMP domain-containing histidine kinase                         | -5.79 | 1.44E-04 |
| rpmC    | 50S ribosomal protein L29                                       | -5.76 | 5.10E-10 |
| DIP1999 | dihydropteroate synthase                                        | -5.75 | 5.94E-06 |
| rpsF    | 30S ribosomal protein S6                                        | -5.73 | 1.25E-09 |
| DIP2077 | Uncharacterized protein                                         | -5.69 | 1.27E-03 |
| opuBB   | Choline transport system permease protein                       | -5.67 | 5.23E-06 |
| rpsE    | 30S ribosomal protein S5                                        | -5.59 | 7.95E-10 |
| DIP1710 | transcriptional repressor                                       | -5.55 | 1.35E-07 |
| DIP1949 | GNAT family N-acetyltransferase                                 | -5.53 | 4.81E-06 |
| DIP0811 | hypothetical protein                                            | -5.50 | 2.52E-06 |
| DIP0964 | S1 family peptidase                                             | -5.48 | 4.19E-05 |
| rplS    | 50S ribosomal protein L19                                       | -5.48 | 5.70E-09 |
| DIP0816 | hypothetical protein                                            | -5.42 | 2.24E-04 |
| tatA    | Sec-independent protein translocase subunit TatA                | -5.35 | 1.82E-08 |
| DIP0118 | nitroreductase family protein                                   | -5.35 | 6.55E-07 |
| rplJ    | 50S ribosomal protein L10                                       | -5.29 | 1.26E-11 |
| DIP0371 | fumarate reductase/succinate dehydrogenase flavoprotein subunit | -5.28 | 5.69E-07 |
| DIP2025 | RtcB family protein                                             | -5.18 | 2.20E-05 |
| rpsN    | 30S ribosomal protein S14                                       | -5.17 | 3.61E-11 |
| rplB    | 50S ribosomal protein L2                                        | -5.10 | 5.28E-12 |
| DIP0641 | hypothetical protein                                            | 2.00  | 1.04E-03 |
| DIP0336 | Uncharacterized protein                                         | 2.03  | 2.06E-03 |
| DIP0017 | Uncharacterized protein                                         | 2.03  | 2.30E-02 |
| DIP0887 | Uncharacterized protein                                         | 2.07  | 5.80E-04 |
| DIP2021 | hypothetical protein                                            | 2.10  | 1.11E-02 |
| DIP0818 | HTH cro/C1-type domain-containing protein                       | 2.11  | 8.40E-04 |
| DIP1526 | Putative transposase                                            | 2.17  | 7.84E-05 |
| tnpA2   | Transposase                                                     | 2.20  | 2.63E-05 |
| DIP1778 | hypothetical protein                                            | 2.20  | 7.45E-04 |

|         |                                                |      |          |
|---------|------------------------------------------------|------|----------|
| DIP1525 | Putative insertion element DNA-binding protein | 2.37 | 2.26E-03 |
|---------|------------------------------------------------|------|----------|

Table S42. Genes with increased (>5-fold) expression level ( $P < 0.05$ ) on Resuscitated vs VBNC+catalase.

| Name    | Description                                                    | Fold change | P-value  |
|---------|----------------------------------------------------------------|-------------|----------|
| DIP0751 | Uncharacterized protein                                        | 126.35      | 1.11E-15 |
| DIP1120 | Uncharacterized protein                                        | 69.26       | 0.00E+00 |
| DIP1121 | Uncharacterized protein                                        | 48.42       | 0.00E+00 |
| DIP2019 | PorH family porin                                              | 15.24       | 0.00E+00 |
| rpsI    | 30S ribosomal protein S9                                       | 14.34       | 0.00E+00 |
| rplM    | 50S ribosomal protein L13                                      | 13.66       | 2.22E-16 |
| rplR    | 50S ribosomal protein L18                                      | 12.78       | 0.00E+00 |
| tuf     | elongation factor Tu                                           | 12.69       | 9.60E-07 |
| rplC    | 50S ribosomal protein L3                                       | 11.87       | 1.62E-14 |
| rpsM    | 30S ribosomal protein S13                                      | 11.04       | 7.11E-15 |
| rpsJ    | 30S ribosomal protein S10                                      | 9.98        | 4.22E-15 |
| rpmD    | 50S ribosomal protein L30                                      | 9.37        | 1.38E-13 |
| ssb1    | Single-stranded DNA-binding protein (SSB)                      | 8.75        | 3.87E-13 |
| rplX    | 50S ribosomal protein L24                                      | 8.63        | 1.67E-15 |
| rplW    | 50S ribosomal protein L23                                      | 8.38        | 0.00E+00 |
| rplD    | 50S ribosomal protein L4                                       | 8.21        | 4.77E-15 |
| rplI    | 50S ribosomal protein L9                                       | 8.18        | 1.28E-13 |
| rpmH    | 50S ribosomal protein L34                                      | 8.17        | 8.88E-16 |
| rplE    | 50S ribosomal protein L5                                       | 8.03        | 6.04E-11 |
| rpmC    | 50S ribosomal protein L29                                      | 7.76        | 3.35E-13 |
| DIP2018 | hypothetical protein                                           | 7.73        | 0.00E+00 |
| rplF    | 50S ribosomal protein L6                                       | 7.41        | 1.41E-13 |
| rpsH    | 30S ribosomal protein S8                                       | 7.14        | 7.09E-11 |
| rpsA    | 30S ribosomal protein S1                                       | 7.08        | 3.37E-10 |
| rpsB    | 30S ribosomal protein S2                                       | 6.92        | 9.25E-13 |
| rpsN    | 30S ribosomal protein S14                                      | 6.76        | 1.38E-14 |
| DIP0093 | Putative membrane protein                                      | 6.70        | 1.63E-06 |
| DIP0737 | DUF418 domain-containing protein                               | 6.67        | 2.02E-10 |
| rpsR2   | ribosomal protein                                              | 6.42        | 2.32E-14 |
| DIP0372 | succinate dehydrogenase/fumarate reductase iron-sulfur subunit | 6.42        | 4.72E-12 |
| rpsE    | 30S ribosomal protein S5                                       | 6.39        | 3.51E-11 |
| rpmA    | 50S ribosomal protein L27                                      | 6.28        | 8.44E-10 |
| rplL    | 50S ribosomal protein L7/L12                                   | 6.27        | 8.88E-16 |

|         |                                                                 |      |          |
|---------|-----------------------------------------------------------------|------|----------|
| DIP0373 | hypothetical protein                                            | 5.87 | 7.89E-10 |
| rplN    | 50S ribosomal protein L14                                       | 5.70 | 3.88E-08 |
| rplB    | 50S ribosomal protein L2                                        | 5.63 | 2.45E-13 |
| rpsL    | 30S ribosomal protein S12                                       | 5.60 | 1.61E-09 |
| DIP0371 | fumarate reductase/succinate dehydrogenase flavoprotein subunit | 5.51 | 2.88E-07 |
| rpsF    | 30S ribosomal protein S6                                        | 5.49 | 3.17E-09 |
| fusA    | elongation factor G                                             | 5.48 | 1.25E-06 |
| DIP1660 | CsbD family protein                                             | 5.38 | 2.28E-12 |
| dirA    | Iron repressible polypeptide (Putative reductase)               | 5.32 | 1.29E-09 |
| DIP2276 | universal stress protein                                        | 5.31 | 1.26E-12 |
| gap     | type I glyceraldehyde-3-phosphate dehydrogenase                 | 5.15 | 1.44E-09 |
| cspA    | Cold-shock protein                                              | 5.05 | 1.51E-09 |
| DIP0923 | Bax inhibitor-1/YccA family protein                             | 5.04 | 7.19E-09 |
| rpoA    | DNA-directed RNA polymerase subunit alpha (RNAP subunit alpha)  | 5.02 | 6.78E-08 |



Table S53. Genes with increased (>1.5-fold) and decreased (>3-fold) expression level ( $P < 0.05$ ) on Resuscitated vs Culturable.

| Name    | Description                                               | Fold change | P-value  |
|---------|-----------------------------------------------------------|-------------|----------|
| opuBB   | Choline transport system permease protein                 | -5.41       | 9.60E-06 |
| DIP1771 | ComEA family DNA-binding protein                          | -5.34       | 1.29E-05 |
| DIP0811 | hypothetical protein                                      | -4.95       | 1.07E-05 |
| DIP2077 | Uncharacterized protein                                   | -4.82       | 3.64E-03 |
| DIP0240 | Ig-like domain repeat protein                             | -4.78       | 5.37E-04 |
| DIP0816 | hypothetical protein                                      | -4.60       | 8.67E-04 |
| sigC    | Putative RNA polymerase sigma factor                      | -4.48       | 1.13E-04 |
| DIP0964 | S1 family peptidase                                       | -4.35       | 3.99E-04 |
| DIP1834 | hypothetical protein                                      | -4.26       | 1.31E-04 |
| DIP0252 | tRNA glutamyl-Q(34) synthetase GluQRS                     | -4.07       | 1.06E-03 |
| DIP0817 | site-specific integrase                                   | -3.99       | 1.18E-03 |
| DIP0153 | hypothetical protein                                      | -3.83       | 5.82E-04 |
| DIP0118 | nitroreductase family protein                             | -3.69       | 1.08E-04 |
| DIP0064 | response regulator transcription factor                   | -3.65       | 1.13E-03 |
| DIP1850 | Rdgb/HAM1 family non-canonical purine NTP pyrophosphatase | -3.55       | 3.14E-04 |
| DIP0263 | DUF1727 domain-containing protein                         | -3.50       | 7.28E-04 |
| DIP0063 | HAMP domain-containing histidine kinase                   | -3.50       | 6.73E-03 |
| DIP2076 | hypothetical protein                                      | -3.46       | 2.27E-03 |
| DIP0113 | deoxyribodipyrimidine photo-lyase                         | -3.39       | 1.97E-03 |
| def     | peptide deformylase                                       | -3.28       | 4.96E-04 |
| DIP1824 | terminase                                                 | -3.26       | 7.60E-03 |
| DIP0124 | PepSY domain-containing protein                           | -3.22       | 1.89E-03 |
| DIP2343 | ATP-binding cassette domain-containing protein            | -3.20       | 8.12E-04 |
| DIP1999 | dihydropteroate synthase                                  | -3.13       | 3.16E-03 |
| DIP0149 | RNA-binding S4 domain-containing protein                  | -3.06       | 7.03E-04 |
| DIP0350 | S1 family peptidase                                       | -3.02       | 3.03E-03 |
| DIP0800 | Uncharacterized protein                                   | -3.02       | 2.42E-02 |
| pknA    | Non-specific serine/threonine protein kinase              | -3.00       | 1.42E-03 |
| DIP2247 | amidase                                                   | 1.52        | 0.019    |
| DIP0887 | Uncharacterized protein                                   | 1.56        | 0.036    |
| DIP1967 | hypothetical protein                                      | 1.56        | 0.015    |
| DIP0317 | hypothetical protein                                      | 1.58        | 0.023    |
| DIP0164 | hypothetical protein                                      | 1.60        | 0.008    |

|         |                                           |      |       |
|---------|-------------------------------------------|------|-------|
| DIP1830 | hypothetical protein                      | 1.64 | 0.024 |
| deoC    | Deoxyribose-phosphate aldolase            | 1.65 | 0.009 |
| DIP0292 | cation:proton antiporter subunit C        | 1.65 | 0.016 |
| DIP0008 | hypothetical protein                      | 1.65 | 0.009 |
| DIP0641 | hypothetical protein                      | 1.66 | 0.018 |
| tnpA2   | Transposase                               | 1.72 | 0.004 |
| DIP0818 | HTH cro/C1-type domain-containing protein | 1.78 | 0.010 |
| DIP0017 | Uncharacterized protein                   | 1.88 | 0.044 |
| DIP1827 | Uncharacterized protein                   | 1.93 | 0.008 |
| DIP1121 | Uncharacterized protein                   | 2.61 | 0.000 |
