# Supplementary material for: Induction and Resuscitation of Viable but Nonculturable Corynebacterium diphtheriae
Source: MDPI journal article supplement (doi:10.3390/microorganisms9050927), 2021-04-26
Supplement: s1 [file s1]

Table S1. Genes with increased (>2-fold) and decreased (>5-fold) expression level ( $P < 0.05$ ) on VBNC vs Culturable.

| Name    | Description                                      | Fold change | P-value  |
|---------|--------------------------------------------------|-------------|----------|
| DIP0751 | Uncharacterized protein                          | -335.39     | 0.00E+00 |
| DIP1120 | Uncharacterized protein                          | -43.70      | 0.00E+00 |
| DIP1121 | Uncharacterized protein                          | -22.26      | 0.00E+00 |
| rpsI    | 30S ribosomal protein S9                         | -16.77      | 0.00E+00 |
| rplC    | 50S ribosomal protein L3                         | -15.78      | 0.00E+00 |
| rplM    | 50S ribosomal protein L13                        | -15.63      | 0.00E+00 |
| DIP2019 | PorH family porin                                | -14.55      | 0.00E+00 |
| DIP0093 | Putative membrane protein                        | -13.82      | 3.60E-11 |
| tuf     | elongation factor Tu                             | -13.74      | 4.35E-07 |
| rplR    | 50S ribosomal protein L18                        | -10.77      | 0.00E+00 |
| rpsJ    | 30S ribosomal protein S10                        | -10.13      | 2.78E-15 |
| ssb1    | Single-stranded DNA-binding protein (SSB)        | -9.81       | 2.14E-14 |
| rpsM    | 30S ribosomal protein S13                        | -9.08       | 8.60E-13 |
| rplI    | 50S ribosomal protein L9                         | -8.66       | 2.72E-14 |
| rpsH    | 30S ribosomal protein S8                         | -8.57       | 1.06E-12 |
| DIP2276 | universal stress protein                         | -8.42       | 0.00E+00 |
| rpmH    | 50S ribosomal protein L34                        | -8.35       | 4.44E-16 |
| rplE    | 50S ribosomal protein L5                         | -8.20       | 3.88E-11 |
| DIP2018 | hypothetical protein                             | -8.07       | 0.00E+00 |
| cspA    | Cold-shock protein                               | -7.85       | 1.44E-14 |
| rplX    | 50S ribosomal protein L24                        | -7.72       | 4.15E-14 |
| DIP0737 | DUF418 domain-containing protein                 | -7.58       | 1.14E-11 |
| rplD    | 50S ribosomal protein L4                         | -7.55       | 5.38E-14 |
| gap     | type I glyceraldehyde-3-phosphate dehydrogenase  | -7.46       | 1.20E-13 |
| DIP0698 | ribosome-associated translation inhibitor RaiA   | -7.35       | 1.64E-11 |
| DIP0856 | trypsin-like peptidase domain-containing protein | -7.34       | 1.23E-11 |
| rplN    | 50S ribosomal protein L14                        | -7.32       | 3.19E-10 |
| DIP0240 | Ig-like domain repeat protein                    | -7.11       | 1.41E-05 |
| DIP0252 | tRNA glutamyl-Q(34) synthetase GluQRS            | -7.02       | 5.42E-06 |
| rpsC    | 30S ribosomal protein S3                         | -6.73       | 1.71E-09 |
| rplW    | 50S ribosomal protein L23                        | -6.67       | 1.11E-16 |
| DIP1660 | CsbD family protein                              | -6.41       | 8.66E-15 |
| DIP0817 | site-specific integrase                          | -6.27       | 1.65E-05 |

|         |                                                                 |       |          |
|---------|-----------------------------------------------------------------|-------|----------|
| rpIF    | 50S ribosomal protein L6                                        | -6.27 | 1.19E-11 |
| sigC    | Putative RNA polymerase sigma factor                            | -6.21 | 2.60E-06 |
| DIP0153 | hypothetical protein                                            | -6.06 | 3.84E-06 |
| rpmD    | 50S ribosomal protein L30                                       | -6.04 | 2.80E-09 |
| rpsA    | 30S ribosomal protein S1                                        | -5.96 | 1.03E-08 |
| rpsB    | 30S ribosomal protein S2                                        | -5.87 | 6.51E-11 |
| DIP0793 | DUF1906 domain-containing protein                               | -5.83 | 5.98E-08 |
| DIP0063 | HAMP domain-containing histidine kinase                         | -5.79 | 1.44E-04 |
| rpmC    | 50S ribosomal protein L29                                       | -5.76 | 5.10E-10 |
| DIP1999 | dihydropteroate synthase                                        | -5.75 | 5.94E-06 |
| rpsF    | 30S ribosomal protein S6                                        | -5.73 | 1.25E-09 |
| DIP2077 | Uncharacterized protein                                         | -5.69 | 1.27E-03 |
| opuBB   | Choline transport system permease protein                       | -5.67 | 5.23E-06 |
| rpsE    | 30S ribosomal protein S5                                        | -5.59 | 7.95E-10 |
| DIP1710 | transcriptional repressor                                       | -5.55 | 1.35E-07 |
| DIP1949 | GNAT family N-acetyltransferase                                 | -5.53 | 4.81E-06 |
| DIP0811 | hypothetical protein                                            | -5.50 | 2.52E-06 |
| DIP0964 | S1 family peptidase                                             | -5.48 | 4.19E-05 |
| rplS    | 50S ribosomal protein L19                                       | -5.48 | 5.70E-09 |
| DIP0816 | hypothetical protein                                            | -5.42 | 2.24E-04 |
| tatA    | Sec-independent protein translocase subunit TatA                | -5.35 | 1.82E-08 |
| DIP0118 | nitroreductase family protein                                   | -5.35 | 6.55E-07 |
| rplJ    | 50S ribosomal protein L10                                       | -5.29 | 1.26E-11 |
| DIP0371 | fumarate reductase/succinate dehydrogenase flavoprotein subunit | -5.28 | 5.69E-07 |
| DIP2025 | RtcB family protein                                             | -5.18 | 2.20E-05 |
| rpsN    | 30S ribosomal protein S14                                       | -5.17 | 3.61E-11 |
| rplB    | 50S ribosomal protein L2                                        | -5.10 | 5.28E-12 |
| DIP0641 | hypothetical protein                                            | 2.00  | 1.04E-03 |
| DIP0336 | Uncharacterized protein                                         | 2.03  | 2.06E-03 |
| DIP0017 | Uncharacterized protein                                         | 2.03  | 2.30E-02 |
| DIP0887 | Uncharacterized protein                                         | 2.07  | 5.80E-04 |
| DIP2021 | hypothetical protein                                            | 2.10  | 1.11E-02 |
| DIP0818 | HTH cro/C1-type domain-containing protein                       | 2.11  | 8.40E-04 |
| DIP1526 | Putative transposase                                            | 2.17  | 7.84E-05 |
| tnpA2   | Transposase                                                     | 2.20  | 2.63E-05 |
| DIP1778 | hypothetical protein                                            | 2.20  | 7.45E-04 |

|         |                                                |      |          |
|---------|------------------------------------------------|------|----------|
| DIP1525 | Putative insertion element DNA-binding protein | 2.37 | 2.26E-03 |
|---------|------------------------------------------------|------|----------|

Table S2. Genes with increased (>5-fold) expression level ( $P < 0.05$ ) on Resuscitated vs VBNC+catalase.

| Name    | Description                                                    | Fold change | P-value  |
|---------|----------------------------------------------------------------|-------------|----------|
| DIP0751 | Uncharacterized protein                                        | 126.35      | 1.11E-15 |
| DIP1120 | Uncharacterized protein                                        | 69.26       | 0.00E+00 |
| DIP1121 | Uncharacterized protein                                        | 48.42       | 0.00E+00 |
| DIP2019 | PorH family porin                                              | 15.24       | 0.00E+00 |
| rpsI    | 30S ribosomal protein S9                                       | 14.34       | 0.00E+00 |
| rplM    | 50S ribosomal protein L13                                      | 13.66       | 2.22E-16 |
| rplR    | 50S ribosomal protein L18                                      | 12.78       | 0.00E+00 |
| tuf     | elongation factor Tu                                           | 12.69       | 9.60E-07 |
| rplC    | 50S ribosomal protein L3                                       | 11.87       | 1.62E-14 |
| rpsM    | 30S ribosomal protein S13                                      | 11.04       | 7.11E-15 |
| rpsJ    | 30S ribosomal protein S10                                      | 9.98        | 4.22E-15 |
| rpmD    | 50S ribosomal protein L30                                      | 9.37        | 1.38E-13 |
| ssb1    | Single-stranded DNA-binding protein (SSB)                      | 8.75        | 3.87E-13 |
| rplX    | 50S ribosomal protein L24                                      | 8.63        | 1.67E-15 |
| rplW    | 50S ribosomal protein L23                                      | 8.38        | 0.00E+00 |
| rplD    | 50S ribosomal protein L4                                       | 8.21        | 4.77E-15 |
| rplI    | 50S ribosomal protein L9                                       | 8.18        | 1.28E-13 |
| rpmH    | 50S ribosomal protein L34                                      | 8.17        | 8.88E-16 |
| rplE    | 50S ribosomal protein L5                                       | 8.03        | 6.04E-11 |
| rpmC    | 50S ribosomal protein L29                                      | 7.76        | 3.35E-13 |
| DIP2018 | hypothetical protein                                           | 7.73        | 0.00E+00 |
| rplF    | 50S ribosomal protein L6                                       | 7.41        | 1.41E-13 |
| rpsH    | 30S ribosomal protein S8                                       | 7.14        | 7.09E-11 |
| rpsA    | 30S ribosomal protein S1                                       | 7.08        | 3.37E-10 |
| rpsB    | 30S ribosomal protein S2                                       | 6.92        | 9.25E-13 |
| rpsN    | 30S ribosomal protein S14                                      | 6.76        | 1.38E-14 |
| DIP0093 | Putative membrane protein                                      | 6.70        | 1.63E-06 |
| DIP0737 | DUF418 domain-containing protein                               | 6.67        | 2.02E-10 |
| rpsR2   | ribosomal protein                                              | 6.42        | 2.32E-14 |
| DIP0372 | succinate dehydrogenase/fumarate reductase iron-sulfur subunit | 6.42        | 4.72E-12 |
| rpsE    | 30S ribosomal protein S5                                       | 6.39        | 3.51E-11 |

|         |                                                                 |      |          |
|---------|-----------------------------------------------------------------|------|----------|
| rpmA    | 50S ribosomal protein L27                                       | 6.28 | 8.44E-10 |
| rplL    | 50S ribosomal protein L7/L12                                    | 6.27 | 8.88E-16 |
| DIP0373 | hypothetical protein                                            | 5.87 | 7.89E-10 |
| rplN    | 50S ribosomal protein L14                                       | 5.70 | 3.88E-08 |
| rplB    | 50S ribosomal protein L2                                        | 5.63 | 2.45E-13 |
| rpsL    | 30S ribosomal protein S12                                       | 5.60 | 1.61E-09 |
| DIP0371 | fumarate reductase/succinate dehydrogenase flavoprotein subunit | 5.51 | 2.88E-07 |
| rpsF    | 30S ribosomal protein S6                                        | 5.49 | 3.17E-09 |
| fusA    | elongation factor G                                             | 5.48 | 1.25E-06 |
| DIP1660 | CsbD family protein                                             | 5.38 | 2.28E-12 |
| dirA    | Iron repressible polypeptide (Putative reductase)               | 5.32 | 1.29E-09 |
| DIP2276 | universal stress protein                                        | 5.31 | 1.26E-12 |
| gap     | type I glyceraldehyde-3-phosphate dehydrogenase                 | 5.15 | 1.44E-09 |
| cspA    | Cold-shock protein                                              | 5.05 | 1.51E-09 |
| DIP0923 | Bax inhibitor-1/YccA family protein                             | 5.04 | 7.19E-09 |
| rpoA    | DNA-directed RNA polymerase subunit alpha (RNAP subunit alpha)  | 5.02 | 6.78E-08 |

Table S3. Genes with increased (>1.5-fold) and decreased (>3-fold) expression level ( $P < 0.05$ ) on Resuscitated vs Culturable.

| Name    | Description                                               | Fold change | P-value  |
|---------|-----------------------------------------------------------|-------------|----------|
| opuBB   | Choline transport system permease protein                 | -5.41       | 9.60E-06 |
| DIP1771 | ComEA family DNA-binding protein                          | -5.34       | 1.29E-05 |
| DIP0811 | hypothetical protein                                      | -4.95       | 1.07E-05 |
| DIP2077 | Uncharacterized protein                                   | -4.82       | 3.64E-03 |
| DIP0240 | Ig-like domain repeat protein                             | -4.78       | 5.37E-04 |
| DIP0816 | hypothetical protein                                      | -4.60       | 8.67E-04 |
| sigC    | Putative RNA polymerase sigma factor                      | -4.48       | 1.13E-04 |
| DIP0964 | S1 family peptidase                                       | -4.35       | 3.99E-04 |
| DIP1834 | hypothetical protein                                      | -4.26       | 1.31E-04 |
| DIP0252 | tRNA glutamyl-Q(34) synthetase GluQRS                     | -4.07       | 1.06E-03 |
| DIP0817 | site-specific integrase                                   | -3.99       | 1.18E-03 |
| DIP0153 | hypothetical protein                                      | -3.83       | 5.82E-04 |
| DIP0118 | nitroreductase family protein                             | -3.69       | 1.08E-04 |
| DIP0064 | response regulator transcription factor                   | -3.65       | 1.13E-03 |
| DIP1850 | RdgB/HAM1 family non-canonical purine NTP pyrophosphatase | -3.55       | 3.14E-04 |
| DIP0263 | DUF1727 domain-containing protein                         | -3.50       | 7.28E-04 |

|         |                                                |       |          |
|---------|------------------------------------------------|-------|----------|
| DIP0063 | HAMP domain-containing histidine kinase        | -3.50 | 6.73E-03 |
| DIP2076 | hypothetical protein                           | -3.46 | 2.27E-03 |
| DIP0113 | deoxyribodipyrimidine photo-lyase              | -3.39 | 1.97E-03 |
| def     | peptide deformylase                            | -3.28 | 4.96E-04 |
| DIP1824 | terminase                                      | -3.26 | 7.60E-03 |
| DIP0124 | PepSY domain-containing protein                | -3.22 | 1.89E-03 |
| DIP2343 | ATP-binding cassette domain-containing protein | -3.20 | 8.12E-04 |
| DIP1999 | dihydropteroate synthase                       | -3.13 | 3.16E-03 |
| DIP0149 | RNA-binding S4 domain-containing protein       | -3.06 | 7.03E-04 |
| DIP0350 | S1 family peptidase                            | -3.02 | 3.03E-03 |
| DIP0800 | Uncharacterized protein                        | -3.02 | 2.42E-02 |
| pknA    | Non-specific serine/threonine protein kinase   | -3.00 | 1.42E-03 |
| DIP2247 | amidase                                        | 1.52  | 0.019    |
| DIP0887 | Uncharacterized protein                        | 1.56  | 0.036    |
| DIP1967 | hypothetical protein                           | 1.56  | 0.015    |
| DIP0317 | hypothetical protein                           | 1.58  | 0.023    |
| DIP0164 | hypothetical protein                           | 1.60  | 0.008    |
| DIP1830 | hypothetical protein                           | 1.64  | 0.024    |
| deoC    | Deoxyribose-phosphate aldolase                 | 1.65  | 0.009    |
| DIP0292 | cation:proton antiporter subunit C             | 1.65  | 0.016    |
| DIP0008 | hypothetical protein                           | 1.65  | 0.009    |
| DIP0641 | hypothetical protein                           | 1.66  | 0.018    |
| tnpA2   | Transposase                                    | 1.72  | 0.004    |
| DIP0818 | HTH cro/C1-type domain-containing protein      | 1.78  | 0.010    |
| DIP0017 | Uncharacterized protein                        | 1.88  | 0.044    |
| DIP1827 | Uncharacterized protein                        | 1.93  | 0.008    |
| DIP1121 | Uncharacterized protein                        | 2.61  | 0.000    |

Table S4. Primers used for RT-qPCR.

| Gene                  | Primer Sequence (5'-3') | Amplicon Size (bp) |
|-----------------------|-------------------------|--------------------|
| <i>tox</i> (DIP0222)  | TCCGGGGCATAAAACACAAC    | 140                |
|                       | GAAGCGGGGTATTTTCAGCA    |                    |
| <i>dtxR</i> (DIP1414) | GCACTTTAGCGACTGCAGTT    | 152                |
|                       | TACTTTCACGAGCCTGCGTT    |                    |
| DIP0751               | GGGGCTGATTTTGGTTTCGACT  | 84                 |
|                       | CGACGCTTAAAATCGGTGGTCT  |                    |

|          |                        |     |
|----------|------------------------|-----|
| DIP1120  | CAAGCGAAAAGGAGGTTGTGTG | 56  |
|          | GGTAACCGTGATGTTCTGGTTG |     |
| 16S rRNA | TGCAACGCGAAGAACCTTAC   | 132 |
|          | GGGACTTAACCCAACATCTCAC |     |
